# Supplementary material
Source: HighWire-hosted journal article supplement (https://thorax.bmj.com/content/76/8/780)
Supplement: inline-supplementary-material-1 [file inline-supplementary-material-1.pdf]

## Online appendix 1: Quality assessment criteria for spirometry

According to American Thoracic Society (ATS) 2005 guidelines on the standardization of spirometry,<sup>1</sup> "acceptable" quality blows may not have any of the following:

1. A cough in the first second of the maneuver
2. Glottis closure or early termination of the blow (i.e., the blow should last  $\geq 6$  seconds, or the volume-time curve should reach a plateau)
3. Obstruction of mouthpiece
4. Sub-maximal blowing effort
5. Leak around mouthpiece
6. Slow start of exhalation (defined as extrapolated volume  $\geq 5\%$  of FVC or  $\geq 150$  ml, whichever is greater).
7. Extra inhalation during the maneuver.

According to the ATS, an adequate test must have at least three acceptable maneuvers. In addition, the difference between the largest and the second-largest values of both FEV<sub>1</sub> and FVC must be  $\leq 150$  ml ( $\leq 100$  ml if the largest FVC is  $\leq 1.00$  liter).<sup>1</sup> To maximize the amount of data available for our analyses, our quality criteria were less strict. We called a test adequate if it contained at least two (rather than three) acceptable maneuvers, and reproducibility was deemed adequate as long as the difference in best and second-best FEV<sub>1</sub> and FVC was  $\leq 250$  ml. In a sensitivity analysis, we applied the stricter ATS criteria for reproducibility.

When calculating summary measures from spirometry, we considered a blow "usable", as long as it did not have problems 1 or 6 listed above. Furthermore, blows were not usable for FEV<sub>1</sub> if there was an extra inhalation in the first second, and they were not usable for FVC if there was any extra inhalation during the maneuver. The criteria are summarized in the table below:

|                                                                       | Disqualifies blow from being... |                             |                |
|-----------------------------------------------------------------------|---------------------------------|-----------------------------|----------------|
|                                                                       | Acceptable                      | Usable for FEV <sub>1</sub> | Usable for FVC |
| Cough in first second                                                 | x                               | x                           | x              |
| Plateau not reached                                                   | x                               |                             |                |
| Obstruction of mouthpiece                                             | x                               |                             |                |
| Sub-maximal blowing effort                                            | x                               |                             |                |
| Leak around mouthpiece                                                | x                               |                             |                |
| Slow start of exhalation (subjectively judged from volume-time curve) | x                               | x                           | x              |
| Extra inhalation before 1 second                                      | x                               | x                           |                |
| Extra inhalation after 1 second                                       | x                               |                             | x              |

The PEF was defined as the highest PEF in a blow that was also usable for FEV<sub>1</sub>. FEF<sub>25</sub>, FEF<sub>50</sub>, FEF<sub>75</sub> and FEF<sub>25-75</sub> were recorded from the blow that had the highest sum of FEV<sub>1</sub> + FVC.

### References for this appendix

- 1 Miller MR, Hankinson J, Brusasco V et al. Standardisation of spirometry. *European Respiratory Journal* 2005;26:319-338. <https://dx.doi.org/10.1183/09031936.05.00034805>
